# Supplementary material for: Disparities in outcomes of COVID-19 hospitalizations in native American individuals
Source: Frontiers journal article supplement (doi:10.3389/fpubh.2023.1220582), 2023-08-15
Supplement: Table_2.xlsx [file Table_2.xlsx]

## Sheet: S1 Insurance
Insurance types	Insurance plans	Frequency	Percentage
Private	BHN-Commercial	1902	23.53%
	BHN-Commercial
	Banner HealthPlans
	Commercial Non Contracted
	Commercial Capitated
	HMO PPO EPO
	BNC FFS COMMERCIAL
	REGIONAL MISCELLANEOUS
	TriCare Champus VA
	Banner Joint Venture
Medicare	BHN-CAP MEDICARE	3443	42.6%
	BHN-Medicare
	Medicare+Choice Non-Capitated
	Medicare+Choice Non-Capitated (continuat
	Medicare
	UPHP MEDICARE
	Medicare+Choice Capitated
Medicaid	Medicaid Out of State	2107	26.07%
	Medicaid/AHCCCS In State
	MEDI-CAL (CA ONLY)
	Medicaid/AHCCCS In State (cont)
	OTHER GOVERNMENT
	UPHP MEDICAID
Self Pay	Self Pay	613	7.58%
Others	Workman Compensation	18	0.22%
	Hospice
	errors

## Sheet: S2 ICD10_diag
Disease Category	ICD9 code	ICD10 code
Acute Myocardial Infarction	410.00, 410.01, 410.02, 410.10, 410.11, 410.12, 410.20, 410.21, 410.22, 410.30, 410.31, 410.32, 410.40, 410.41, 410.42, 410.50, 410.51, 410.52, 410.60, 410.61, 410.62, 410.70, 410.71, 410.72, 410.80, 410.81, 410.82, 410.90, 410.91, 410.92	I21.01, I21.02, I21.09, I21.11, I21.19, I21.21, I21.29,
		I21.3, I21.4, I21.9, I21.A1, I21.A9
		I22.0, I22.1, I22.2, I22.8, I22.9
Angina	413.0, 413.1, 413.9, 411.0, 411.1	413.0, 413.1, 413.9, 411.0
	411.81, 411.89	411.1, 411.81, 411.89
Valvular heart disease	CPT codes:	CPT codes:
	33400, 33401, 33403, 33405, 33406	33400, 33401, 33403, 33405, 33406
	33410, 33411, 33412, 33413,33417	33410, 33411, 33412, 33413,33417
	92986, 92987	92986, 92987
	33420, 33422, 33425 33400	33420, 33422, 33425 33400
	33401, 33403, 33405, 33406	33401, 33403, 33405, 33406
	33410, 33411, 33412, 33413	33410, 33411, 33412, 33413
	33417, 92986, 33420, 33422	33417, 92986, 33420, 33422
	33425, 33426, 33427, 33430	33425, 33426, 33427, 33430
	ICD9 procedure codes:	ICD10 procedure codes:
	35.02, 35.12, 35.23, 35.24,	02NG3ZZ, 02NG4ZZ
	ICD9 diagnosis codes:	027G04Z, 027G0DZ, 027G0ZZ,02NG0ZZ, 02NG0ZZ, 02VG0ZZ
	394.0 395.0 395.1	02RG07Z, 02RG08Z, 02RG0KZ , 02RG37Z , 02RG38Z, 02RG3KZ, 02RG47Z , 02RG48Z , 02RG4KZ/
	395.2 395.9 424.1 746.3 746.4	02RG0JZ, 02RG3JZ, 02RG4JZ
	746.81, 394.1, 394.2, 394.9, 424.0, 746.5,746.6, 92987,396.0, 396.1, 396.2, 396.3, 396.8, 396.9
		ICD10 diagnosis codes
		I05.X (X: 0-9), I06.X (X: 0-9), I08.X (X: 0-9), I34.0, I34.8, Q23.X(X=0-9)
Atrial fibrillation or flutter	427.31, 427.32	I48.91, I48.92
Coronary artery bypass graft (CABG) surgery	CPT codes
	33510, 33511, 33512, 33513	CPT codes
	33514, 33516, 33517, 33518	33510, 33511, 33512, 33513
	33519, 33521, 33522, 33523, 33533	33514, 33516, 33517, 33518
	33534, 33535, 33536	33519, 33521, 33522, 33523, 33533
	93539, 93540	33534, 33535, 33536
		93539, 93540
	ICD9 procedure codes:
	36.10, 36.11, 36.12, 36.13, 36.14, 36.15, 36.16, 36.17, 36.19	ICD10 procedure codes
	ICD9 diagnosis codes	0210XXX (X 0-9 or A-Z)
	414.02, 414.03	0211XXX (X 0-9 or A-Z)
	414.04, 414.05	0212XXX (X 0-9 or A-Z)
	414.06, 414.07	0213XXX (X 0-9 or A-Z)
		ICD10 diagnosis codes
		I25.810, I25.811
		I25.812
Stroke	430, 431	I63.XXX (X=0-9)
	432.0, 432.1, 432.9	I62.X (X=0-9)
	433.00, 433.01, 433.10	I61.X (X=0-9)
	433.11, 433.20, 433.21	I60.XX (X=0-9)
	433.30, 433.31, 433.80	I65.X or I65.XX (X=0-9)
	433.81, 433.90, 433.91	I66.XX (X=0-9)
	434.00, 434.01, 434.10	I67.XXX (X=0-9)
	434.11, 434.90, 434.91, 435.0,	I69.XXX(X=0-9)
	435.1, 435.2, 435.3 435.8,	G46.3
	435.9, 436, 437.0, 437.1,	G46.4
	437.2 , 437.3 , 437.4, 437.5,
	437.6, 437.7, 437.8, 437.9,
	438.0, 438.10, 438.11, 438.12, 438.13, 438.14, 438.19, 438.20 ,438.21, 438.22, 438.30, 438.31, 438.32, 438.40, 438.41, 438.42, 438.50, 438.51, 438.52, 438.53, 438.6, 438.7, 438.81, 438.82,
	438.83, 438.84, 438.85, 438.89, 438.9
Chronic kidney disease
	016.00, 016.01, 016.02	A18.11, A52.75,
	016.03, 016.04	D30.0, D41.00, D41.20,
	016.05, 016.06, 095.4	E08.2X (X=0,2,9)
	223.0, 236.91	E09.2X (X=0,2,9)
	249.40, 249.41	E10.2X (X=0,2,9)
	250.40, 250.41, 250.42, 250.43	E11.2X (X=0,2,9)
	271.4, 274.10, 283.11	N18.X (X=0-9)
	403.01, 403.11, 403.91	I12.0, I12.9
	404.02, 404.03, 404.12	I13.XX or I13.X (X=0-9)
		E74.8, M10.30, D59.3
	404.13, 404.92, 404.93	I70.1, I72.2
	440.1, 442.1, 572.4	K76.7
	580.0, 580.4	N00.X, N01.X, N02.X, N03.X, N04.X, N05.X, N06.X, N08.X
	580.81, 580.89	(X=0-9)
	580.9, 581.0	Q61.XX (X=0-9)
	581.1, 581.2	R94.4
	581.3, 581.81, 581.89
	581.9, 582.0, 582.1, 582.2,
	582.4, 582.81, 582.89, 582.9,
	583.0, 583.1, 583.2, 583.4
	583.6, 583.7, 583.81, 583.89,
	583.9, 584.5, 584.6, 584.7,
	584.8, 584.9, 585.1, 585.2
	585.3, 585.4, 585.5, 585.6,
	585.9, 586, 587, 588.0, 588.1, 588.81, 588.89, 588.9, 591,
	753.12, 753.13, 753.14, 753.15,753.16, 753.17,
	753.19, 753.20, 753.21,
	753.22, 753.23, 753.29, 794.4
Chronic liver disease	070.0, 070.20, 070.21, 070.22, 070.23, 070.30, 070.31, 070.32, 070.33, 070.41, 070.42, 070.43, 070.44, 070.49, 070.51, 070.52, 070.53, 070.54, 070.59, 070.6,	B15.X, B16.X, B17.XX, B18.X
	571.0, 571.1, 571.2, 571.3,	(X=0-9)
	571.40, 571.41, 571.49, 571.5,
	571.6, 571.8, 571.9, 572.0,	K70, K71, K72, K73, K74, K75, K76, K77
	572.2, 572.3, 572.4, 572.8,
	573.0, 573.1, 573.2, 573.3,
	573.4, 573.8, 573.9
Chronic lung disease	490, 491.0, 491.1, 491.20,
	491.21, 491.22, 491.8, 491.9,	J41, J42, J43, J44, J45,
	492.0, 492.8, 493.00, 493.01,	J46, J47, J98.2
	493.02, 493.10, 493.11 ,493.12, 493.20, 493.21, 493.22, 493.90 ,493.91, 493.92, 494.0, 494.1,
	495.0 ,495.1 ,495.2, 495.3,
	495.4, 495.5, 495.6, 495.7,
	495.8, 495.9, 496.2, 518.1,
	518.2
Hypoxemia	799.02	R09.02
	518.51	J96.01
	518.81	J96.11
	518.83	J96.21
	518.84
Coronary heart disease	411.81, 414.12, 414.2	I25.XX
	414.00, 414.01, 414.02	(X=0-9)
	414.03, 414.04, 414.05
	414.06, 414.07, 414.11
	414.3, 414.4
Diabetes Mellitus
	250.00, 250.01, 790.21	E08, E09, E10, E11, E13
	790.22, 790.29, 791.5	R73.01, R81, Z96.41, Z46.81
	791.6, V45.85, V53.91
	V65.46, 250.02, 250.03
	250.10, 250.11, 250.12
	250.13, 250.20, 250.21
	250.22, 250.23, 250.30
	250.31, 250.32, 250.33
	250.40, 250.41, 250.42
	250.43, 250.50, 250.51
	250.52, 250.53, 250.60
	250.61, 250.62, 250.63, 250.70
	250.71, 250.72, 250.73, 250.80
	250.81, 250.82, 250.83, 250.90
	250.91, 250.92, 250.93
Dementia	290.0, 290.10, 290.13, 290.20, 291.21, 290.40, 290.41
	290.42, 290.43, 290.8	F03 F02 F01
	290.9, 331.0, 331.11
	331.19, 331.2, 331.7
	331.81, 331.82, 331.89,
	331.9
Depression	296.20, 296.21, 296.22
	296.23, 296.24, 296.25	F53.X, F33.X, F32.X
	296.26, 296.30, 296.31	F31.X, F34.1, F43.21
	296.32, 296.33, 296.34
	296.35, 296.36, 296.40	(X=0-9)
	296.41, 296.42, 296.43
	296.44, 296.45, 296.46
	296.50, 296.51, 296.52
	296.53, 296.54, 296.55
	296.56, 296.60, 296.61
	296.62, 296.63, 296.64
	296.65, 296.66, 296.80
	296.82, 296.89, 300.4
	301.12, 309.1
Dyslipidemia
	272.0, 272.1, 272.2	E78.0, E78.1, E78.2, E78.3
	272.3, 272.4	E78.4, E78.2, E78.4
Hyperlipidemia	272.2, 272.4	E78.2, E78.4, E78.5
Hypertension	401.1, 401.9, 401.0
	402.00, 402.01, 402.10	I10.X, I11.X, 12.X, I67.4
	402.11, 402.90, 402.91
	403.00, 403.01, 403.10
	403.11, 403.9, 403.90	(X=0-9)
	403.91, 404.00, 404.01
	404.02, 404.03, 404.10
	404.11, 404.12, 404.13,
	404.90, 404.91, 404.92,
	404.93, 405.01, 405.09,
	405.11, 405.19, 405.91,
	405.99, 437.2
Hyperthyroidism	242.00, 242.01
	242.10, 242.11	E05.XX
	242.20, 242.21
	242.30, 242.31	(X=0-9)
	242.40, 242.41
	242.80, 242.81
	242.90, 242.91
Hypothyroidism	243, 244.0	E03.X
	244.1, 244.2	E00.9
	244.3, 244.8	E02.X
	244.9	(X=0-9)
Ischemic heart disease	411.89, 414.8	I24.8, I25.5
	414.9	I25.89, I25.9
Insomnia	780.52, 780.51	G47.00, G47.0X, (X=0-9)
	780.50, 780.59
	291.82, 292.85	F10.182, F10.282, F10.982
	307.41, 307.42	F51.02, F51.09
	307.40, 307.49	A81.83
	327.01, 046.72
	327.00, 327.09
Percutaneous coronary intervention	ICD9 procedure codes	ICD10 procedure codes
	36.01, 36.02, 36.05, 36.06,	02703XX , 02713XX
	36.07, 36.09	02723XX , 02733XX
		02704XX , 02714XX
	CPT codes	02724XX , 02734XX
	92980, 92981	02C03XX, 02C13XX
	92982, 92984, 92995, 92996	02C23XX, 02C33XX
		02C14XX, 02C24XX,
		02C34XX ,02C04XX
		(X=0-9 or A-Z)
		CPT codes
		92980, 92981
		92982, 92984, 92995, 92996
Pericarditis	115.03, 115.13, 119.93,	B39.4, B39.5
	036.41, 074.21,	I32.X, A39.53
	093.81, 093.83	(X=0-9)
	391.0, 393.X, 420.0,
	420.90, 420.91, 420.99,	B33.23, A52.06
	423.0, 423.1, 423.2,	I01.0, I09.2
	423.8, 423.9	I31.X
		(X=0-9)
Peripheral arterial disease	CTP codes	CTP codes
	33335, 33860, 33870,	33335, 33860, 33870, 35450
	35450, 35452, 35454,	35452, 35454, 35456, 35458
	35456, 35458, 35459,	35459, 35470, 35471
	35470, 35471, 35472,	35472, 35473, 35474,
	35473, 35474, 35475	35475, 35476, 35511,
	35476, 35511, 35516,	35516, 35518, 35521
	35518, 35521, 35531,	35531, 35533, 35536
	35533, 35536, 35541,	35541, 35546, 35548
	35546, 35548	35549, 35551, 35556
	35549, 35551, 35556	35558, 35560, 35563
	35558, 35560, 35563	35565, 35566, 35571
	35565, 35566, 35571	35583, 35585, 35587
	35583, 35585, 35587	35612, 35616, 35621
	35612, 35616, 35621	35623, 35631, 35636
	35623, 35631, 35636	35641, 35646, 35650
	35641, 35646, 35650	35651, 35654, 35656
	35651, 35654, 35656	35661, 35663, 35665
	35661, 35663, 35665	35666, 35671, 35879
	35666, 35671, 35879	75968, 75962, 75964,
	75968, 75962, 75964, 75966	75966
	ICD9 procedure codes	ICD-10 codes
	38.13, 38.14	I70.X, Q25.1
	38.15, 38.16 ,38.18	ICD-10 procedure codes
	39.22, 39.24 ,39.25 ,39.26, 39.50	03C5XXX (X 0-9 or A-Z)
		03C6XXX (X 0-9 or A-Z)
	ICD9 diagnosis codes	03C7XXX (X 0-9 or A-Z)
	440.0 440.1, 440.20, 440.21	03C8XXX (X 0-9 or A-Z)
	440.30, 440.31, 440.32	03C9XXX (X 0-9 or A-Z)
	440.8, 440.9,	03CAXXX (X 0-9 or A-Z)
	747.10, 747.20, 747.21,	03CBXXX (X 0-9 or A-Z)
	747.22, 747.29	03CCXXX (X 0-9 or A-Z)
		03CDXXX (X 0-9 or A-Z)
		03CFXXX (X 0-9 or A-Z)
		03CYXXX (X 0-9 or A-Z)
		021XXXX (X 0-9 or A-Z)
		031XXXX (X 0-9 or A-Z)
		027XXX (X 0-9 or A-Z)
		037XXX (X 0-9 or A-Z)
Rheumatic heart disease
	391.0, 391.1, 391.2, 391.8,	I01.X, I02.X, I09.X
	391.9, 392.0, 392.9, 393,
	397.1, 397.9, 398.0,	(X=0-9)
	398.90, 398.91, 398.99
Ventricular Fibrillation	ICD9 diagnosis codes	ICD10 procedure codes
	427.1, 427.2, 427.41,	I47.2, I47.9, I49.1,
	427.42	I49.02
Defibrillator	ICD9 diagnosis codes	Diagnosis codes
	V45.02, V45.00, V53.39	Z95.810, Z95.811, Z95.0,
	V45.01, V53.31, V53.32	Z45.010, Z45.018
Heart Transplant	ICD9 Diagnosis codes	Diagnosis codes
	V42.1	Z94.1
	ICD9 procedure codes	Procedure codes
	37.60, 37.62, 37.63,	02YAXXX (X 0-9 or A-Z)
	37.64, 37.65, 37.66,
	37.67
Do not Resuscitate	V49.86	Z66
Sepsis	995.91,	A41.X, A42.7, A32.7, A42.7, A40.X, R65.2, A02.1, A41.81, T81.44
	038.XX (X=0-9)	(X=0-9)
COVID-19		U07.1

## Sheet: S3 Correlation_inpatients
	Stroke	ChronicKidney	ChronicLiver	Hypoxemia	ChronicLung	CoronaryHeart	DiabetesMellitus	Dementia	Depression	Dyslipidemia	Hyperlipidemia	Hypertension	Hyperthyroidism	Hypothyroidism	IschemicHeart	Insomnia	Defibrillator	NotResuscitate	AcuteMyocardialInfarction	AtrialFibrillation	VentricularFibrillation	MorbidObesity	SleepApnea	ObesityHypoventilation	cough	abd	dysnea	fever	myalgia	Median_Income	PATIENT_AGE	Female	Male	American Indian	Black or African American	Hispanic	Others	Others	White/Caucasian	Medicaid	Medicare	Others	Others	Private	Self_pay	ed
Stroke	1	0.190147	0.0305984	0.0249939	0.00871294	0.20765	0.106052	0.153981	0.117624	0.116256	0.223525	0.144646	0.0311175	0.071499	0.0916376	0.0593499	0.0890539	0.182887	0.126057	0.147358	0.0954203	-0.0134683	0.0379808	0.0279854	-0.0835286	-0.0351201	-0.0978952	-0.0571454	0.01428	0.00530531	0.19338	-0.0226625	0.0226625	-0.0171716	0.0124848	-0.0505641	-0.00113802	-0.00591314	0.0538174	-0.0704687	0.191929	-0.00113802	-0.00591314	-0.106491	-0.0699536	0.0217174
ChronicKidney	0.190147	1	0.0931645	0.0857903	0.00240536	0.339371	0.15246	0.16229	0.164069	0.140384	0.33062	0.13687	0.0404253	0.158828	0.237305	0.0954902	0.183736	0.231554	0.197152	0.227364	0.138588	0.0597183	0.138444	0.0631239	-0.102167	0.0184591	-0.0795878	-0.0584582	0.0477727	0.0142557	0.29106	-0.0319267	0.0319267	-0.0139429	0.0622539	-0.103358	-0.0174972	-0.0185342	0.087802	-0.120252	0.312148	-0.0174972	-0.0185342	-0.16648	-0.113581	0.0500295
ChronicLiver	0.0305984	0.0931645	1	-0.0116754	0.0129367	0.0541789	0.0292966	-0.0113676	0.0839436	0.0312153	0.013914	0.0411164	-0.0146732	0.0146325	0.0477723	0.0842595	0.0160138	0.0600199	0.0378511	0.046555	0.0551667	0.000131739	0.0195662	0.0197693	-0.0472612	0.0315427	-0.0442793	-0.0323051	0.0273989	-0.0515275	-0.0198289	-0.0489859	0.0489859	0.0734432	0.012236	-0.027237	0.0133584	-0.0111432	-0.0222386	0.0806624	-0.0117091	0.0133584	-0.0111432	-0.046	-0.0361969	-0.00150644
Hypoxemia	0.0249939	0.0857903	-0.0116754	1	-0.0374868	0.108423	0.0842708	0.0628966	0.032415	0.0114264	0.105672	0.0961188	-0.0406793	0.0483826	0.0762452	0.0347989	0.0672281	0.0637752	0.0532849	0.0615014	0.0482332	0.0767462	0.0931039	0.0648351	0.0732851	-0.0444109	0.172566	0.0527753	-0.00370567	0.026567	0.147179	-0.0435408	0.0435408	-0.0205439	-0.0336555	-0.014594	-0.015466	-0.00771075	0.0474961	-0.0831977	0.0927454	-0.015466	-0.00771075	-0.0213093	0.000245944	0.107577
ChronicLung	0.00871294	0.00240536	0.0129367	-0.0374868	1	-0.00693278	0.0290067	-0.0235459	0.00461501	0.0453895	0.0198869	0.0169396	0.0011808	0.00606708	0.00915345	0.0118211	0.00267188	0.132408	-0.000578281	0.0125456	0.0436932	0.018959	0.00582018	0.0162295	-0.0032952	-0.00540621	0.0170862	0.00531575	-0.00442128	-0.0143786	0.0254907	-0.0364247	0.0364247	0.0114973	-0.0209693	0.0294239	-0.00876423	-0.00681975	-0.0217374	-0.0099857	0.0207311	-0.00876423	-0.00681975	-0.00170346	-0.0182198	0.00948348
CoronaryHeart	0.20765	0.339371	0.0541789	0.108423	-0.00693278	1	0.182287	0.166394	0.166616	0.185091	0.399977	0.345912	0.0321962	0.125816	0.311754	0.0825634	0.282395	0.209738	0.303218	0.26845	0.187174	0.0353542	0.16124	0.0473276	-0.0563213	-0.0177041	-0.0346819	-0.0543221	0.0274	0.0344421	0.342685	-0.0787683	0.0787683	-0.0657832	0.00695483	-0.108185	-0.0156135	-0.0112147	0.14498	-0.151459	0.330228	-0.0156135	-0.0112147	-0.15926	-0.108475	0.079454
DiabetesMellitus	0.106052	0.15246	0.0292966	0.0842708	0.0290067	0.182287	1	0.00664028	0.094316	0.162577	0.339864	0.13467	0.0201797	0.0686206	0.106504	0.00319532	0.0536785	0.0559445	0.101111	0.0759015	0.0547552	0.198245	0.159799	0.0823641	0.00508138	0.000134486	0.0143425	-0.0252197	0.0419241	-0.0749198	0.135144	-0.0122172	0.0122172	0.039746	0.0124722	0.0763975	0.000977037	-0.0148682	-0.103043	-0.0135967	0.109852	0.000977037	-0.0148682	-0.0800305	-0.0517569	0.0552123
Dementia	0.153981	0.16229	-0.0113676	0.0628966	-0.0235459	0.166394	0.00664028	1	0.125628	0.0593202	0.174322	0.107502	0.0078997	0.125484	0.088408	0.0310106	0.0967007	0.308787	0.0301426	0.138645	0.0491279	-0.103004	-0.0207174	-0.00246153	-0.103269	-0.0363236	-0.0876225	-0.0544024	-0.0189426	0.0695178	0.374059	0.0356388	-0.0356388	-0.0571262	-0.00898144	-0.116385	-0.0119713	0.00370021	0.154733	-0.146765	0.300026	-0.0119713	0.00370021	-0.153724	-0.0713742	0.0634074
Depression	0.117624	0.164069	0.0839436	0.032415	0.00461501	0.166616	0.094316	0.125628	1	0.168296	0.19311	0.117721	0.0376618	0.16897	0.0921901	0.205469	0.0488388	0.113046	0.0815151	0.0942784	0.0790598	0.0903908	0.140602	0.0769951	-0.0578237	-0.00736133	-0.0555548	-0.0270889	0.0239239	0.0135565	0.0742601	0.121698	-0.121698	-0.0548061	-0.00418191	-0.115719	-0.0396761	-0.00578156	0.16192	-0.0146802	0.156836	-0.0396761	-0.00578156	-0.104672	-0.0998542	0.0389008
Dyslipidemia	0.116256	0.140384	0.0312153	0.0114264	0.0453895	0.185091	0.162577	0.0593202	0.168296	1	0.279849	0.116136	0.0377354	0.0790677	0.0943979	0.0810581	0.0649078	0.0797356	0.0792282	0.0940884	0.0443081	0.0984147	0.126019	0.0425165	-0.000746412	0.00215645	-0.0184698	0.00307837	0.00967892	0.00500913	0.108929	0.0446816	-0.0446816	-0.0405211	0.00370397	-0.0212878	-0.00860969	0.00402346	0.0439902	-0.0454859	0.108361	-0.00860969	0.00402346	-0.047224	-0.0520223	0.0395069
Hyperlipidemia	0.223525	0.33062	0.013914	0.105672	0.0198869	0.399977	0.339864	0.174322	0.19311	0.279849	1	0.237665	0.0334381	0.193988	0.193187	0.0805269	0.151226	0.208959	0.165769	0.207499	0.120868	0.0669326	0.178407	0.0681143	-0.0464582	-0.00811198	-0.0227905	-0.0365163	0.0104453	0.0368369	0.40256	-0.0266151	0.0266151	-0.06728	-0.00361126	-0.0734627	-0.0191703	-0.0186558	0.117638	-0.164304	0.365623	-0.0191703	-0.0186558	-0.152017	-0.163567	0.0971054
Hypertension	0.144646	0.13687	0.0411164	0.0961188	0.0169396	0.345912	0.13467	0.107502	0.117721	0.116136	0.237665	1	0.0185245	0.0832736	0.279974	0.0426282	0.245302	0.15587	0.183155	0.261536	0.173121	0.104289	0.200614	0.148535	-0.0492863	-0.014622	-0.00452067	-0.0397471	0.050468	0.00969909	0.213764	-0.0205927	0.0205927	-0.0284837	-0.00861132	-0.0946277	-0.00965739	-0.0012232	0.117078	-0.0762835	0.204022	-0.00965739	-0.0012232	-0.109965	-0.0781668	0.0579557
Hyperthyroidism	0.0311175	0.0404253	-0.0146732	-0.0406793	0.0011808	0.0321962	0.0201797	0.0078997	0.0376618	0.0377354	0.0334381	0.0185245	1	0.116358	0.00594925	0.00530033	0.0109892	0.00243034	0.0272712	0.0421662	0.0126057	-0.0142745	0.0132096	-0.000991229	-0.0140004	-0.0146392	-0.0164244	-0.00928908	-0.00423224	-0.00267411	0.00602353	0.0442724	-0.0442724	0.0072496	0.0135023	-0.0100375	-0.00507022	0.0198352	0.00190303	0.00608734	0.024278	-0.00507022	0.0198352	-0.0232565	-0.0217091	-0.0101571
Hypothyroidism	0.071499	0.158828	0.0146325	0.0483826	0.00606708	0.125816	0.0686206	0.125484	0.16897	0.0790677	0.193988	0.0832736	0.116358	1	0.0566271	0.0440575	0.0703844	0.140804	0.0567761	0.0961257	0.0340928	0.0417568	0.080167	0.0354475	-0.030852	-0.00517466	-0.0253906	-0.0303013	0.0223763	0.0360322	0.216298	0.166822	-0.166822	-0.0387091	-0.0338517	-0.0794971	-0.0186341	0.000815042	0.122963	-0.09818	0.207945	-0.0186341	0.000815042	-0.087404	-0.0856973	0.0384905
IschemicHeart	0.0916376	0.237305	0.0477723	0.0762452	0.00915345	0.311754	0.106504	0.088408	0.0921901	0.0943979	0.193187	0.279974	0.00594925	0.0566271	1	0.0451577	0.273267	0.12979	0.219095	0.188742	0.165248	0.0469301	0.0899983	0.0226499	-0.0542698	0.0055253	-0.0148077	-0.0342589	0.00741198	0.0226452	0.161213	-0.0659069	0.0659069	-0.0339352	0.0133682	-0.0551151	-0.00198759	-0.0122855	0.0669754	-0.0630126	0.164252	-0.00198759	-0.0122855	-0.0843879	-0.0649025	0.0481893
Insomnia	0.0593499	0.0954902	0.0842595	0.0347989	0.0118211	0.0825634	0.00319532	0.0310106	0.205469	0.0810581	0.0805269	0.0426282	0.00530033	0.0440575	0.0451577	1	0.0161711	0.0515029	0.0712907	0.0684278	0.0348655	0.0360845	0.0602668	0.0218171	-0.0282082	0.000307325	-0.0136026	-0.0363713	0.0266996	0.00719759	0.0462408	-0.000334371	0.000334371	-0.0194099	0.00112614	-0.0571271	-0.00811708	-0.00175682	0.0697624	-0.0141257	0.0744721	-0.00811708	-0.00175682	-0.0475015	-0.0392529	0.0217173
Defibrillator	0.0890539	0.183736	0.0160138	0.0672281	0.00267188	0.282395	0.0536785	0.0967007	0.0488388	0.0649078	0.151226	0.245302	0.0109892	0.0703844	0.273267	0.0161711	1	0.128876	0.0967377	0.265551	0.181068	0.0337031	0.104773	0.0256754	-0.0377169	-0.0177332	-0.00785361	-0.0309918	0.0250372	0.0182479	0.183865	-0.0239629	0.0239629	-0.0221243	-0.00520467	-0.0750539	-0.0218486	0.0151978	0.09765	-0.0956417	0.181963	-0.0218486	0.0151978	-0.0818175	-0.0528887	0.0357127
NotResuscitate	0.182887	0.231554	0.0600199	0.0637752	0.132408	0.209738	0.0559445	0.308787	0.113046	0.0797356	0.208959	0.15587	0.00243034	0.140804	0.12979	0.0515029	0.128876	1	0.112648	0.246363	0.122183	-0.0583299	0.0419038	0.0090894	-0.115613	-0.0633497	-0.0604164	-0.0590826	0.0153203	0.016722	0.440505	-0.035113	0.035113	-0.0242224	-0.0534962	-0.122658	0.00345137	-0.00840603	0.158733	-0.15373	0.364261	0.00345137	-0.00840603	-0.188467	-0.121978	0.0398143
AcuteMyocardialInfarction	0.126057	0.197152	0.0378511	0.0532849	-0.000578281	0.303218	0.101111	0.0301426	0.0815151	0.0792282	0.165769	0.183155	0.0272712	0.0567761	0.219095	0.0712907	0.0967377	0.112648	1	0.115082	0.154176	0.0359723	0.0764348	0.0381576	-0.0685256	-0.0164884	-0.0339187	-0.058379	0.0128527	-0.0295792	0.119601	-0.0327378	0.0327378	-0.00687486	0.0212907	-0.0106786	-0.0275217	-0.00227903	0.0153551	-0.0343166	0.124508	-0.0275217	-0.00227903	-0.0704955	-0.0622943	0.00393394
AtrialFibrillation	0.147358	0.227364	0.046555	0.0615014	0.0125456	0.26845	0.0759015	0.138645	0.0942784	0.0940884	0.207499	0.261536	0.0421662	0.0961257	0.188742	0.0684278	0.265551	0.246363	0.115082	1	0.148174	0.0447166	0.138749	0.0556023	-0.0752999	-0.0193358	-0.0405122	-0.0427272	0.0214523	0.0485262	0.278552	-0.0616934	0.0616934	-0.0545835	-0.014346	-0.119866	-0.0136293	-0.00969841	0.160106	-0.100492	0.229007	-0.0136293	-0.00969841	-0.113583	-0.0773857	0.0398288
VentricularFibrillation	0.0954203	0.138588	0.0551667	0.0482332	0.0436932	0.187174	0.0547552	0.0491279	0.0790598	0.0443081	0.120868	0.173121	0.0126057	0.0340928	0.165248	0.0348655	0.181068	0.122183	0.154176	0.148174	1	0.026875	0.0792209	0.0333923	-0.0317631	-0.0139253	-0.0105393	-0.0131099	-0.00217152	-0.00585003	0.0965083	-0.0665782	0.0665782	-0.00732426	0.0318685	-0.0581232	-0.0046113	0.00314179	0.0484592	-0.0334906	0.111705	-0.0046113	0.00314179	-0.0670895	-0.0461717	0.0117712
MorbidObesity	-0.0134683	0.0597183	0.000131739	0.0767462	0.018959	0.0353542	0.198245	-0.103004	0.0903908	0.0984147	0.0669326	0.104289	-0.0142745	0.0417568	0.0469301	0.0360845	0.0337031	-0.0583299	0.0359723	0.0447166	0.026875	1	0.312747	0.150357	0.0475464	0.00178438	0.0856205	0.0497062	0.0246687	-0.0476232	-0.191602	0.103898	-0.103898	0.0464021	0.00153516	0.016839	-0.0272856	-0.00710615	-0.0304143	0.0588708	-0.104589	-0.0272856	-0.00710615	0.0839538	-0.035521	0.00597849
SleepApnea	0.0379808	0.138444	0.0195662	0.0931039	0.00582018	0.16124	0.159799	-0.0207174	0.140602	0.126019	0.178407	0.200614	0.0132096	0.080167	0.0899983	0.0602668	0.104773	0.0419038	0.0764348	0.138749	0.0792209	0.312747	1	0.206648	0.0225324	-0.00808852	0.0418387	0.032967	0.0317478	0.0378964	0.0489199	-0.044823	0.044823	-0.0109741	0.00846063	-0.0855443	-0.0218833	-0.000493674	0.0958438	-0.0461397	0.0848723	-0.0218833	-0.000493674	-0.00518594	-0.0736188	0.0505107
ObesityHypoventilation	0.0279854	0.0631239	0.0197693	0.0648351	0.0162295	0.0473276	0.0823641	-0.00246153	0.0769951	0.0425165	0.0681143	0.148535	-0.000991229	0.0354475	0.0226499	0.0218171	0.0256754	0.0090894	0.0381576	0.0556023	0.0333923	0.150357	0.206648	1	-0.00837819	-0.00561012	0.00532154	-0.0083862	0.0131638	-0.0159171	-0.0145266	0.00886714	-0.00886714	0.000708813	0.00653698	-0.0223287	-0.0232358	-0.00520661	0.0282764	0.0122029	0.0199494	-0.0232358	-0.00520661	-0.0236374	-0.018696	0.0139544
cough	-0.0835286	-0.102167	-0.0472612	0.0732851	-0.0032952	-0.0563213	0.00508138	-0.103269	-0.0578237	-0.000746412	-0.0464582	-0.0492863	-0.0140004	-0.030852	-0.0542698	-0.0282082	-0.0377169	-0.115613	-0.0685256	-0.0752999	-0.0317631	0.0475464	0.0225324	-0.00837819	1	0.072532	0.313397	0.406223	-0.0137394	0.0240229	-0.0933834	-0.00479651	0.00479651	-0.0809935	-0.00309113	0.10223	-0.0355152	-0.00930659	-0.0438275	0.0019438	-0.10828	-0.0355152	-0.00930659	0.0964868	0.0460806	0.273684
abd	-0.0351201	0.0184591	0.0315427	-0.0444109	-0.00540621	-0.0177041	0.000134486	-0.0363236	-0.00736133	0.00215645	-0.00811198	-0.014622	-0.0146392	-0.00517466	0.0055253	0.000307325	-0.0177332	-0.0633497	-0.0164884	-0.0193358	-0.0139253	0.00178438	-0.00808852	-0.00561012	0.072532	1	-0.00182145	0.0885706	0.00313339	-0.00982607	-0.0226918	0.0466301	-0.0466301	-0.0371396	0.0183958	0.0388194	-0.0223876	-0.0164917	-0.0189788	-0.00531515	-0.00722766	-0.0223876	-0.0164917	0.00506041	0.0171419	0.145663
dyspnea	-0.0978952	-0.0795878	-0.0442793	0.172566	0.0170862	-0.0346819	0.0143425	-0.0876225	-0.0555548	-0.0184698	-0.0227905	-0.00452067	-0.0164244	-0.0253906	-0.0148077	-0.0136026	-0.00785361	-0.0604164	-0.0339187	-0.0405122	-0.0105393	0.0856205	0.0418387	0.00532154	0.313397	-0.00182145	1	0.230807	-0.010073	0.0458511	-0.0462331	-0.0265678	0.0265678	-0.0851012	-0.0244643	0.0991765	-0.024478	-0.0110977	-0.0330248	-0.0326159	-0.0850138	-0.024478	-0.0110977	0.102419	0.0507455	0.339484
fever	-0.0571454	-0.0584582	-0.0323051	0.0527753	0.00531575	-0.0543221	-0.0252197	-0.0544024	-0.0270889	0.00307837	-0.0365163	-0.0397471	-0.00928908	-0.0303013	-0.0342589	-0.0363713	-0.0309918	-0.0590826	-0.058379	-0.0427272	-0.0131099	0.0497062	0.032967	-0.0083862	0.406223	0.0885706	0.230807	1	0.00279533	0.0424733	-0.0703716	-0.017249	0.017249	-0.0835438	0.00267867	0.0507953	-0.00749956	-0.0130535	-0.00546527	-0.010511	-0.0723521	-0.00749956	-0.0130535	0.066665	0.0480779	0.271808
myalgia	0.01428	0.0477727	0.0273989	-0.00370567	-0.00442128	0.0274	0.0419241	-0.0189426	0.0239239	0.00967892	0.0104453	0.050468	-0.00423224	0.0223763	0.00741198	0.0266996	0.0250372	0.0153203	0.0128527	0.0214523	-0.00217152	0.0246687	0.0317478	0.0131638	-0.0137394	0.00313339	-0.010073	0.00279533	1	-0.0177205	-0.00409961	0.0059919	-0.0059919	-0.000373534	0.0273218	-0.00752196	0.00249401	-0.00601639	-0.00630174	0.0165814	0.000103243	0.00249401	-0.00601639	-0.0101349	-0.0103783	0.0551609
Median_Income	0.00530531	0.0142557	-0.0515275	0.026567	-0.0143786	0.0344421	-0.0749198	0.0695178	0.0135565	0.00500913	0.0368369	0.00969909	-0.00267411	0.0360322	0.0226452	0.00719759	0.0182479	0.016722	-0.0295792	0.0485262	-0.00585003	-0.0476232	0.0378964	-0.0159171	0.0240229	-0.00982607	0.0458511	0.0424733	-0.0177205	1	0.0912171	-0.0249952	0.0249952	-0.178018	0.0131742	-0.155692	-0.0188371	0.00429076	0.247465	-0.18311	0.0594113	-0.0188371	0.00429076	0.140365	-0.0323238	0.0993511
PATIENT_AGE	0.19338	0.29106	-0.0198289	0.147179	0.0254907	0.342685	0.135144	0.374059	0.0742601	0.108929	0.40256	0.213764	0.00602353	0.216298	0.161213	0.0462408	0.183865	0.440505	0.119601	0.278552	0.0965083	-0.191602	0.0489199	-0.0145266	-0.0933834	-0.0226918	-0.0462331	-0.0703716	-0.00409961	0.0912171	1	-0.0478156	0.0478156	-0.125127	-0.0561802	-0.179981	0.0112875	-0.0232637	0.266251	-0.402843	0.677508	0.0112875	-0.0232637	-0.2728	-0.15621	0.156444
Female	-0.0226625	-0.0319267	-0.0489859	-0.0435408	-0.0364247	-0.0787683	-0.0122172	0.0356388	0.121698	0.0446816	-0.0266151	-0.0205927	0.0442724	0.166822	-0.0659069	-0.000334371	-0.0239629	-0.035113	-0.0327378	-0.0616934	-0.0665782	0.103898	-0.044823	0.00886714	-0.00479651	0.0466301	-0.0265678	-0.017249	0.0059919	-0.0249952	-0.0478156	1	-1	0.0312781	0.00470269	0.0101657	0.00419927	-0.0153565	-0.0303022	0.0531139	0.00338747	0.00419927	-0.0153565	-0.0251513	-0.0513685	-0.0522403
Male	0.0226625	0.0319267	0.0489859	0.0435408	0.0364247	0.0787683	0.0122172	-0.0356388	-0.121698	-0.0446816	0.0266151	0.0205927	-0.0442724	-0.166822	0.0659069	0.000334371	0.0239629	0.035113	0.0327378	0.0616934	0.0665782	-0.103898	0.044823	-0.00886714	0.00479651	-0.0466301	0.0265678	0.017249	-0.0059919	0.0249952	0.0478156	-1	1	-0.0312781	-0.00470269	-0.0101657	-0.00419927	0.0153565	0.0303022	-0.0531139	-0.00338747	-0.00419927	0.0153565	0.0251513	0.0513685	0.0522403
American Indian	-0.0171716	-0.0139429	0.0734432	-0.0205439	0.0114973	-0.0657832	0.039746	-0.0571262	-0.0548061	-0.0405211	-0.06728	-0.0284837	0.0072496	-0.0387091	-0.0339352	-0.0194099	-0.0221243	-0.0242224	-0.00687486	-0.0545835	-0.00732426	0.0464021	-0.0109741	0.000708813	-0.0809935	-0.0371396	-0.0851012	-0.0835438	-0.000373534	-0.178018	-0.125127	0.0312781	-0.0312781	1	-0.068516	-0.229083	-0.0580721	-0.00276106	-0.234281	0.16117	-0.0857965	-0.0580721	-0.00276106	-0.0445716	-0.0350967	-0.272086
Black or African American	0.0124848	0.0622539	0.012236	-0.0336555	-0.0209693	0.00695483	0.0124722	-0.00898144	-0.00418191	0.00370397	-0.00361126	-0.00861132	0.0135023	-0.0338517	0.0133682	0.00112614	-0.00520467	-0.0534962	0.0212907	-0.014346	0.0318685	0.00153516	0.00846063	0.00653698	-0.00309113	0.0183958	-0.0244643	0.00267867	0.0273218	0.0131742	-0.0561802	0.00470269	-0.00470269	-0.068516	1	-0.206882	-0.0524442	-0.000547519	-0.211576	0.013503	-0.012416	-0.0524442	-0.000547519	0.00394625	-0.00542571	0.0384943
Hispanic	-0.0505641	-0.103358	-0.027237	-0.014594	0.0294239	-0.108185	0.0763975	-0.116385	-0.115719	-0.0212878	-0.0734627	-0.0946277	-0.0100375	-0.0794971	-0.0551151	-0.0571271	-0.0750539	-0.122658	-0.0106786	-0.119866	-0.0581232	0.016839	-0.0855443	-0.0223287	0.10223	0.0388194	0.0991765	0.0507953	-0.00752196	-0.155692	-0.179981	0.0101657	-0.0101657	-0.229083	-0.206882	1	-0.175347	-0.0125985	-0.707405	0.143011	-0.187167	-0.175347	-0.0125985	-0.00219211	0.118205	0.0746762
Others	-0.00113802	-0.0174972	0.0133584	-0.015466	-0.00876423	-0.0156135	0.000977037	-0.0119713	-0.0396761	-0.00860969	-0.0191703	-0.00965739	-0.00507022	-0.0186341	-0.00198759	-0.00811708	-0.0218486	0.00345137	-0.0275217	-0.0136293	-0.0046113	-0.0272856	-0.0218833	-0.0232358	-0.0355152	-0.0223876	-0.024478	-0.00749956	0.00249401	-0.0188371	0.0112875	0.00419927	-0.00419927	-0.0580721	-0.0524442	-0.175347	1	-0.00996026	-0.179326	-0.00791676	-0.0142891	1	-0.00996026	0.014526	0.0183159	-0.0872707
Others	-0.00591314	-0.0185342	-0.0111432	-0.00771075	-0.00681975	-0.0112147	-0.0148682	0.00370021	-0.00578156	0.00402346	-0.0186558	-0.0012232	0.0198352	0.000815042	-0.0122855	-0.00175682	0.0151978	-0.00840603	-0.00227903	-0.00969841	0.00314179	-0.00710615	-0.000493674	-0.00520661	-0.00930659	-0.0164917	-0.0110977	-0.0130535	-0.00601639	0.00429076	-0.0232637	-0.0153565	0.0153565	-0.00276106	-0.000547519	-0.0125985	-0.00996026	1	0.0183163	-0.0280518	-0.0406952	-0.00996026	1	-0.0262066	-0.0135333	-0.00479524
White/Caucasian	0.0538174	0.087802	-0.0222386	0.0474961	-0.0217374	0.14498	-0.103043	0.154733	0.16192	0.0439902	0.117638	0.117078	0.00190303	0.122963	0.0669754	0.0697624	0.09765	0.158733	0.0153551	0.160106	0.0484592	-0.0304143	0.0958438	0.0282764	-0.0438275	-0.0189788	-0.0330248	-0.00546527	-0.00630174	0.247465	0.266251	-0.0303022	0.0303022	-0.234281	-0.211576	-0.707405	-0.179326	0.0183163	1	-0.229242	0.242694	-0.179326	0.0183163	0.0174911	-0.104461	0.084181
Medicaid	-0.0704687	-0.120252	0.0806624	-0.0831977	-0.0099857	-0.151459	-0.0135967	-0.146765	-0.0146802	-0.0454859	-0.164304	-0.0762835	0.00608734	-0.09818	-0.0630126	-0.0141257	-0.0956417	-0.15373	-0.0343166	-0.100492	-0.0334906	0.0588708	-0.0461397	0.0122029	0.0019438	-0.00531515	-0.0326159	-0.010511	0.0165814	-0.18311	-0.402843	0.0531139	-0.0531139	0.16117	0.013503	0.143011	-0.00791676	-0.0280518	-0.229242	1	-0.511489	-0.00791676	-0.0280518	-0.329384	-0.170097	-0.125706
Medicare	0.191929	0.312148	-0.0117091	0.0927454	0.0207311	0.330228	0.109852	0.300026	0.156836	0.108361	0.365623	0.204022	0.024278	0.207945	0.164252	0.0744721	0.181963	0.364261	0.124508	0.229007	0.111705	-0.104589	0.0848723	0.0199494	-0.10828	-0.00722766	-0.0850138	-0.0723521	0.000103243	0.0594113	0.677508	0.00338747	-0.00338747	-0.0857965	-0.012416	-0.187167	-0.0142891	-0.0406952	0.242694	-0.511489	1	-0.0142891	-0.0406952	-0.477843	-0.246763	0.104819
Others_race	-0.00113802	-0.0174972	0.0133584	-0.015466	-0.00876423	-0.0156135	0.000977037	-0.0119713	-0.0396761	-0.00860969	-0.0191703	-0.00965739	-0.00507022	-0.0186341	-0.00198759	-0.00811708	-0.0218486	0.00345137	-0.0275217	-0.0136293	-0.0046113	-0.0272856	-0.0218833	-0.0232358	-0.0355152	-0.0223876	-0.024478	-0.00749956	0.00249401	-0.0188371	0.0112875	0.00419927	-0.00419927	-0.0580721	-0.0524442	-0.175347	1	-0.00996026	-0.179326	-0.00791676	-0.0142891	1	-0.00996026	0.014526	0.0183159	-0.0872707
Others_insurance	-0.00591314	-0.0185342	-0.0111432	-0.00771075	-0.00681975	-0.0112147	-0.0148682	0.00370021	-0.00578156	0.00402346	-0.0186558	-0.0012232	0.0198352	0.000815042	-0.0122855	-0.00175682	0.0151978	-0.00840603	-0.00227903	-0.00969841	0.00314179	-0.00710615	-0.000493674	-0.00520661	-0.00930659	-0.0164917	-0.0110977	-0.0130535	-0.00601639	0.00429076	-0.0232637	-0.0153565	0.0153565	-0.00276106	-0.000547519	-0.0125985	-0.00996026	1	0.0183163	-0.0280518	-0.0406952	-0.00996026	1	-0.0262066	-0.0135333	-0.00479524
Private	-0.106491	-0.16648	-0.046	-0.0213093	-0.00170346	-0.15926	-0.0800305	-0.153724	-0.104672	-0.047224	-0.152017	-0.109965	-0.0232565	-0.087404	-0.0843879	-0.0475015	-0.0818175	-0.188467	-0.0704955	-0.113583	-0.0670895	0.0839538	-0.00518594	-0.0236374	0.0964868	0.00506041	0.102419	0.066665	-0.0101349	0.140365	-0.2728	-0.0251513	0.0251513	-0.0445716	0.00394625	-0.00219211	0.014526	-0.0262066	0.0174911	-0.329384	-0.477843	0.014526	-0.0262066	1	-0.158908	-0.00601825
Self_pay	-0.0699536	-0.113581	-0.0361969	0.000245944	-0.0182198	-0.108475	-0.0517569	-0.0713742	-0.0998542	-0.0520223	-0.163567	-0.0781668	-0.0217091	-0.0856973	-0.0649025	-0.0392529	-0.0528887	-0.121978	-0.0622943	-0.0773857	-0.0461717	-0.035521	-0.0736188	-0.018696	0.0460806	0.0171419	0.0507455	0.0480779	-0.0103783	-0.0323238	-0.15621	-0.0513685	0.0513685	-0.0350967	-0.00542571	0.118205	0.0183159	-0.0135333	-0.104461	-0.170097	-0.246763	0.0183159	-0.0135333	-0.158908	1	0.023163
Admitted through ED	0.0217174	0.0500295	-0.00150644	0.107577	0.00948348	0.079454	0.0552123	0.0634074	0.0389008	0.0395069	0.0971054	0.0579557	-0.0101571	0.0384905	0.0481893	0.0217173	0.0357127	0.0398143	0.00393394	0.0398288	0.0117712	0.00597849	0.0505107	0.0139544	0.273684	0.145663	0.339484	0.271808	0.0551609	0.0993511	0.156444	-0.0522403	0.0522403	-0.272086	0.0384943	0.0746762	-0.0872707	-0.00479524	0.084181	-0.125706	0.104819	-0.0872707	-0.00479524	-0.00601825	0.023163	1

## Sheet: S4 VIF_inpatients
	variables	VIF
0	Stroke	1.24036
1	ChronicKidney	1.7066
2	ChronicLiver	1.10609
3	Hypoxemia	2.77093
4	ChronicLung	1.0563
5	CoronaryHeart	1.96283
6	DiabetesMellitus	2.16881
7	Dementia	1.32186
8	Depression	1.49265
9	Dyslipidemia	1.23895
10	Hyperlipidemia	2.60323
11	Hypertension	1.48489
12	Hyperthyroidism	1.03387
13	Hypothyroidism	1.3308
14	IschemicHeart	1.32084
15	Insomnia	1.13693
16	Defibrillator	1.26681
17	NotResuscitate	1.69436
18	AcuteMyocardialInfarction	1.24352
19	AtrialFibrillation	1.40726
20	VentricularFibrillation	1.14758
21	MorbidObesity	1.87401
22	SleepApnea	1.3959
23	ObesityHypoventilation	1.08634
24	cough	1.93903
25	abd	1.17071
26	dyspnea	2.33077
27	fever	1.78254
28	myalgia	1.03068
29	Male	2.08458
30	American Indian	1.23978
31	Black or African American	1.15155
32	Hispanic	2.133
33	Medicaid	1.82672
34	Others_race	1.09121
35	Others_insurance	1.0074
36	Private	1.69209
37	Self_pay	1.30494
38	Admitted through ED	5.69252

## Sheet: S5 Correlation_ICU
	Stroke	ChronicKidney	ChronicLiver	Hypoxemia	ChronicLung	CoronaryHeart	DiabetesMellitus	Dementia	Depression	Dyslipidemia	Hyperlipidemia	Hypertension	Hyperthyroidism	Hypothyroidism	IschemicHeart	Insomnia	Defibrillator	NotResuscitate	AcuteMyocardialInfarction	AtrialFibrillation	VentricularFibrillation	MorbidObesity	SleepApnea	cough	abd	dysnea	fever	myalgia	Median_Income	PATIENT_AGE	Female	Male	American Indian	Black or African American	Hispanic	Others	Others	White/Caucasian	Medicaid	Medicare	Others	Others	Private	Self_pay	ed2icu
Stroke	1	0.128263	0.0108348	0.00554137	-0.0211086	0.158584	0.100448	0.172947	0.112585	0.0692623	0.1821	0.0623549	0.024808	0.0603334	0.0482446	0.0140695	0.0472464	0.142848	0.0892314	0.129075	0.106755	-0.0389327	-0.0109204	-0.0777106	-0.0410822	-0.0920447	-0.0461113	0.012409	0.0274881	0.151376	-0.000466059	0.000466059	-0.011455	0.0516564	-0.0310092	0.00463238	-0.0163632	0.0151712	-0.0599879	0.144296	0.00463238	-0.0163632	-0.0780608	-0.0544628	0.0562327
ChronicKidney	0.128263	1	0.085867	0.104978	-0.040426	0.326327	0.132264	0.140715	0.130278	0.0488912	0.302438	0.0579054	0.00688242	0.148758	0.191745	0.0824389	0.174593	0.170217	0.170783	0.192014	0.156729	0.0417544	0.0820834	-0.0762694	0.0473269	-0.0609258	-0.0429692	0.0710798	0.0439275	0.228964	-0.0185076	0.0185076	-0.0334847	0.0971407	-0.0779671	-0.028873	-0.0267159	0.0747302	-0.100386	0.238668	-0.028873	-0.0267159	-0.125048	-0.0949279	0.0178109
ChronicLiver	0.0108348	0.085867	1	0.0182742	-0.0251099	0.0446381	0.00482009	-0.0270365	0.0274673	0.0422963	-0.0189374	0.0401273	-0.00713534	0.00118097	0.0265475	0.0539231	0.0195394	0.0530916	0.0092538	0.0120733	0.0167112	-0.00636631	0.034833	-0.0200144	0.0305617	-0.0402752	-0.00871153	0.0584585	-0.0220774	-0.0518049	-0.0236357	0.0236357	0.0762115	0.0586905	-0.0491225	0.0135773	-0.011916	-0.0340496	0.12068	-0.0627823	0.0135773	-0.011916	-0.0337952	-0.037885	-0.0106295
Hypoxemia	0.00554137	0.104978	0.0182742	1	-0.103439	0.127451	0.0271961	0.0745393	0.0943869	-0.029602	0.098634	0.085905	-0.0157851	0.0702194	0.111923	0.0810795	0.0801761	-0.0355189	0.0403354	0.0430981	0.0281119	-0.0240462	0.0548757	0.0202468	-0.0164695	0.0267501	0.0241102	0.0435747	0.071354	0.092648	0.0549922	-0.0549922	-0.0304658	0.0175462	-0.0659132	-0.0414285	-0.00906494	0.0998205	-0.0220029	0.108629	-0.0414285	-0.00906494	-0.0957716	-0.0223337	0.0634347
ChronicLung	-0.0211086	-0.040426	-0.0251099	-0.103439	1	-0.0611619	0.017732	-0.0417988	0.002192	0.009703	-0.0145598	-0.0248169	-0.00275583	0.0043142	-0.0225115	0.00492135	-0.0147799	0.1462	-0.0529488	-0.0205587	0.0581704	-0.0132091	-0.0331221	0.0122548	0.0138489	0.0583013	0.0139709	-0.028245	-0.0146695	0.00917554	-0.0467902	0.0467902	-0.015292	-0.0163388	0.0973279	-0.0213499	-0.0108068	-0.0698361	-0.0215716	0.025992	-0.0213499	-0.0108068	0.00450172	-0.0196023	-0.0875626
CoronaryHeart	0.158584	0.326327	0.0446381	0.127451	-0.0611619	1	0.182095	0.140098	0.132777	0.0825963	0.377354	0.285788	-0.00516223	0.11183	0.267213	0.065396	0.274206	0.175299	0.271569	0.212598	0.189718	0.0244117	0.131227	-0.0562489	-0.045789	-0.0086195	-0.0499638	0.0465253	0.0765425	0.308202	-0.0574573	0.0574573	-0.0796742	0.00948763	-0.107273	-0.0289385	-0.0234662	0.172253	-0.174145	0.326693	-0.0289385	-0.0234662	-0.148576	-0.100697	0.0321093
DiabetesMellitus	0.100448	0.132264	0.00482009	0.0271961	0.017732	0.182095	1	0.0250853	0.0758	0.0977343	0.291672	0.0952715	-0.00724175	0.0470479	0.103042	0.00933977	0.0317984	0.0266994	0.0814085	0.0483413	0.0519358	0.191187	0.131428	-0.00135219	-0.0101832	-0.0242186	-0.024614	0.0722112	-0.0564112	0.082183	0.0315101	-0.0315101	0.0242051	0.028532	0.0631623	-0.0228388	-0.0237036	-0.0806154	0.00021946	0.0960643	-0.0228388	-0.0237036	-0.0799791	-0.0627951	-0.0432207
Dementia	0.172947	0.140715	-0.0270365	0.0745393	-0.0417988	0.140098	0.0250853	1	0.0786451	-0.0066567	0.169779	0.0741778	-0.0109286	0.0771806	0.0686353	0.0315349	0.0489892	0.194551	0.0088263	0.0819293	0.0344684	-0.119604	-0.0620856	-0.0742443	-0.0124162	-0.0420481	-0.0636459	-0.0171765	0.0871471	0.326823	0.0238109	-0.0238109	-0.0560888	0.00733801	-0.0542641	-0.0224209	-0.0129532	0.10069	-0.143559	0.260938	-0.0224209	-0.0129532	-0.129759	-0.0537815	0.0629115
Depression	0.112585	0.130278	0.0274673	0.0943869	0.002192	0.132777	0.0758	0.0786451	1	0.0992259	0.166659	0.0865546	0.0479145	0.107406	0.0916931	0.171056	0.0658992	0.104927	0.035094	0.134301	0.0773768	0.0692804	0.117657	-0.0213359	0.0193553	-0.0128066	0.0202311	0.0181708	0.0423192	0.058991	0.129949	-0.129949	-0.089034	-0.0156744	-0.0824178	-0.0272331	-0.0225912	0.1634	-0.0610342	0.129026	-0.0272331	-0.0225912	-0.0625325	-0.0454528	0.0167965
Dyslipidemia	0.0692623	0.0488912	0.0422963	-0.029602	0.009703	0.0825963	0.0977343	-0.0066567	0.0992259	1	0.181495	0.0819638	-0.00266548	0.0761412	0.0318516	0.0668572	0.0235371	0.0474024	0.0479966	0.0619468	0.0439336	0.12602	0.0863543	0.0378142	0.0245217	-0.000784598	0.0595848	0.0321123	0.015641	0.00098106	0.024703	-0.024703	-0.0378194	0.0456663	-0.0119849	-0.00676592	-0.0153937	0.0222268	-0.000869361	0.0168736	-0.00676592	-0.0153937	-0.0159059	-0.0038844	0.00210217
Hyperlipidemia	0.1821	0.302438	-0.0189374	0.098634	-0.0145598	0.377354	0.291672	0.169779	0.166659	0.181495	1	0.196298	0.016822	0.191015	0.181834	0.0569913	0.127715	0.176591	0.118122	0.178426	0.129869	0.0545433	0.14364	-0.00947495	0.021948	0.0188935	-0.00559329	0.0266913	0.0812088	0.329217	0.00963098	-0.00963098	-0.110852	0.0110606	-0.063387	-0.0196323	-0.0405877	0.144456	-0.143751	0.313465	-0.0196323	-0.0405877	-0.140897	-0.140993	0.0419089
Hypertension	0.0623549	0.0579054	0.0401273	0.085905	-0.0248169	0.285788	0.0952715	0.0741778	0.0865546	0.0819638	0.196298	1	0.0109054	0.0983641	0.206749	0.0325234	0.163879	0.134506	0.138267	0.16289	0.104016	0.062937	0.157852	-0.0580241	-0.0255701	0.00133849	-0.0227477	0.0595138	0.0164487	0.17556	0.0202496	-0.0202496	-0.046267	-0.0473446	-0.0705094	-0.0225806	-0.019304	0.133066	-0.0588818	0.166068	-0.0225806	-0.019304	-0.0943195	-0.0744336	0.05131
Hyperthyroidism	0.024808	0.00688242	-0.00713534	-0.0157851	-0.00275583	-0.00516223	-0.00724175	-0.0109286	0.0479145	-0.00266548	0.016822	0.0109054	1	0.100376	-0.013693	-0.0269515	-0.0216721	-0.00148912	0.0176292	0.00662891	-0.00971664	-0.0166998	-0.0148304	-0.029079	-0.0309006	-0.0116373	-0.0171401	-0.0124149	-0.00372698	-0.00582234	0.0762063	-0.0762063	0.0348033	0.0271372	-0.0115684	0.036673	-0.00475006	-0.0414298	0.0342852	-0.00559097	0.036673	-0.00475006	-0.0158443	-0.025866	0.0136474
Hypothyroidism	0.0603334	0.148758	0.00118097	0.0702194	0.0043142	0.11183	0.0470479	0.0771806	0.107406	0.0761412	0.191015	0.0983641	0.100376	1	0.0443312	0.0336105	0.0744107	0.134678	0.00820472	0.0820117	0.0369125	0.0391697	0.0278554	-0.00257613	0.000272462	0.0142887	-0.00573472	0.029635	0.051506	0.206578	0.184391	-0.184391	-0.0542952	0.00133425	-0.0513127	-0.0308879	-0.0202923	0.103129	-0.0855513	0.194298	-0.0308879	-0.0202923	-0.0887705	-0.0927042	-0.0282611
IschemicHeart	0.0482446	0.191745	0.0265475	0.111923	-0.0225115	0.267213	0.103042	0.0686353	0.0916931	0.0318516	0.181834	0.206749	-0.013693	0.0443312	1	0.0602637	0.198889	0.0898544	0.163913	0.133514	0.117661	0.0107634	0.0386392	-0.081183	-0.0143048	-0.00408988	-0.0245029	-0.00422224	0.0467339	0.153619	-0.052555	0.052555	-0.0709612	0.0186692	-0.0385743	-0.00576999	-0.0137518	0.0823306	-0.0695122	0.152154	-0.00576999	-0.0137518	-0.0748419	-0.0589523	0.0484936
Insomnia	0.0140695	0.0824389	0.0539231	0.0810795	0.00492135	0.065396	0.00933977	0.0315349	0.171056	0.0668572	0.0569913	0.0325234	-0.0269515	0.0336105	0.0602637	1	0.0108849	0.00983187	0.0633045	0.0732109	0.0606532	0.0569373	0.075158	-0.0151942	-0.0134802	0.0224505	-0.0231237	-0.0124137	-0.0176264	-0.00795095	0.00472782	-0.00472782	-0.0280681	-0.0123383	-0.0256053	-0.00204595	-0.0117109	0.0510242	0.0141235	0.0509958	-0.00204595	-0.0117109	-0.0564362	-0.0363557	-0.0166448
Defibrillator	0.0472464	0.174593	0.0195394	0.0801761	-0.0147799	0.274206	0.0317984	0.0489892	0.0658992	0.0235371	0.127715	0.163879	-0.0216721	0.0744107	0.198889	0.0108849	1	0.105289	0.0844819	0.178275	0.153518	0.0212901	0.0910679	0.00436162	-0.013597	0.0371382	0.0117212	0.0860292	0.0583058	0.160746	-0.0176227	0.0176227	-0.0402437	-0.0181788	-0.0743513	-0.019445	-0.00941691	0.119124	-0.0950508	0.153922	-0.019445	-0.00941691	-0.0534594	-0.0512789	0.0107616
NotResuscitate	0.142848	0.170217	0.0530916	-0.0355189	0.1462	0.175299	0.0266994	0.194551	0.104927	0.0474024	0.176591	0.134506	-0.00148912	0.134678	0.0898544	0.00983187	0.105289	1	0.0809421	0.211291	0.102515	-0.0728088	0.012237	-0.0935434	-0.0304091	-0.0292794	-0.059407	0.0464568	0.0367594	0.390985	-0.040149	0.040149	-0.0517453	-0.0470176	-0.0375144	-0.019866	-0.0170086	0.1023	-0.142889	0.325114	-0.019866	-0.0170086	-0.16628	-0.128257	-0.0601489
AcuteMyocardialInfarction	0.0892314	0.170783	0.0092538	0.0403354	-0.0529488	0.271569	0.0814085	0.0088263	0.035094	0.0479966	0.118122	0.138267	0.0176292	0.00820472	0.163913	0.0633045	0.0844819	0.0809421	1	0.0740978	0.123191	-0.00349745	0.032957	-0.0774358	-0.0235321	-0.0298538	-0.0674386	0.0221766	-0.0285184	0.0926018	-0.0128481	0.0128481	-0.0273016	0.0281401	0.0490554	-0.0586844	-0.0146094	-0.0135423	-0.00852832	0.0998895	-0.0586844	-0.0146094	-0.0750433	-0.0643958	0.0718899
AtrialFibrillation	0.129075	0.192014	0.0120733	0.0430981	-0.0205587	0.212598	0.0483413	0.0819293	0.134301	0.0619468	0.178426	0.16289	0.00662891	0.0820117	0.133514	0.0732109	0.178275	0.211291	0.0740978	1	0.0793454	0.032353	0.109576	-0.0284183	-0.000136063	0.0130563	-0.0159676	-0.0177481	0.0752805	0.225507	-0.0252398	0.0252398	-0.0837723	-0.019444	-0.0892066	-0.0370257	-0.02033	0.172939	-0.0801649	0.159514	-0.0370257	-0.02033	-0.0859319	-0.0336862	-0.00973913
VentricularFibrillation	0.106755	0.156729	0.0167112	0.0281119	0.0581704	0.189718	0.0519358	0.0344684	0.0773768	0.0439336	0.129869	0.104016	-0.00971664	0.0369125	0.117661	0.0606532	0.153518	0.102515	0.123191	0.0793454	1	-0.00511597	0.0783316	-0.0132642	-0.00121856	0.00151208	-0.0113646	-0.0159091	0.0186896	0.0925161	-0.0821699	0.0821699	-0.0460391	0.0400874	-0.0525916	-0.0278384	-0.0126143	0.0811419	-0.0447899	0.0951742	-0.0278384	-0.0126143	-0.041368	-0.0429841	-0.00511597
MorbidObesity	-0.0389327	0.0417544	-0.00636631	-0.0240462	-0.0132091	0.0244117	0.191187	-0.119604	0.0692804	0.12602	0.0545433	0.062937	-0.0166998	0.0391697	0.0107634	0.0569373	0.0212901	-0.0728088	-0.00349745	0.032353	-0.00511597	1	0.343968	0.0768261	-0.00871318	0.0908891	0.109143	-0.00109505	0.00510043	-0.235207	0.120713	-0.120713	0.0290431	-0.0061632	0.0133512	-0.0608588	0.031204	-0.00105055	0.0746499	-0.132693	-0.0608588	0.031204	0.0749642	0.0038685	-0.0522001
SleepApnea	-0.0109204	0.0820834	0.034833	0.0548757	-0.0331221	0.131227	0.131428	-0.0620856	0.117657	0.0863543	0.14364	0.157852	-0.0148304	0.0278554	0.0386392	0.075158	0.0910679	0.012237	0.032957	0.109576	0.0783316	0.343968	1	0.0200886	0.0179983	0.0530693	0.062914	0.025955	0.0530484	-0.0223954	-0.0327337	0.0327337	-0.0301241	-0.0148313	-0.0606056	-0.0545461	-0.0187251	0.114134	-0.0366897	0.0429483	-0.0545461	-0.0187251	0.0126835	-0.0392702	-0.000501553
cough	-0.0777106	-0.0762694	-0.0200144	0.0202468	0.0122548	-0.0562489	-0.00135219	-0.0742443	-0.0213359	0.0378142	-0.00947495	-0.0580241	-0.029079	-0.00257613	-0.081183	-0.0151942	0.00436162	-0.0935434	-0.0774358	-0.0284183	-0.0132642	0.0768261	0.0200886	1	0.109585	0.331339	0.454305	-0.00173287	0.0435866	-0.0952409	-0.0108771	0.0108771	-0.110668	-0.0175991	0.0890026	-0.0335572	-0.00161536	0.0103477	-0.00797437	-0.0793205	-0.0335572	-0.00161536	0.0948483	0.0212079	-0.00370531
abd	-0.0410822	0.0473269	0.0305617	-0.0164695	0.0138489	-0.045789	-0.0101832	-0.0124162	0.0193553	0.0245217	0.021948	-0.0255701	-0.0309006	0.000272462	-0.0143048	-0.0134802	-0.013597	-0.0304091	-0.0235321	-0.000136063	-0.00121856	-0.00871318	0.0179983	0.109585	1	-0.00396981	0.137903	-0.0189128	0.0185727	-0.0192604	0.0267969	-0.0267969	-0.0673311	0.012482	0.00619233	-0.010538	-0.0134269	0.0398851	-0.0204804	0.00756555	-0.010538	-0.0134269	0.0291038	-0.0243548	-0.004864
dyspnea	-0.0920447	-0.0609258	-0.0402752	0.0267501	0.0583013	-0.0086195	-0.0242186	-0.0420481	-0.0128066	-0.000784598	0.0188935	0.00133849	-0.0116373	0.0142887	-0.00408988	0.0224505	0.0371382	-0.0292794	-0.0298538	0.0130563	0.00151208	0.0908891	0.0530693	0.331339	-0.00396981	1	0.256172	-0.0334863	0.102617	0.000944543	-0.0177238	0.0177238	-0.142513	-0.0112955	0.123671	-0.0420325	-0.0170535	-0.00105586	-0.0326526	-0.00949794	-0.0420325	-0.0170535	0.0522792	-0.00377984	0.126754
fever	-0.0461113	-0.0429692	-0.00871153	0.0241102	0.0139709	-0.0499638	-0.024614	-0.0636459	0.0202311	0.0595848	-0.00559329	-0.0227477	-0.0171401	-0.00573472	-0.0245029	-0.0231237	0.0117212	-0.059407	-0.0674386	-0.0159676	-0.0113646	0.109143	0.062914	0.454305	0.137903	0.256172	1	0.00908799	0.0424419	-0.0785504	-0.0170572	0.0170572	-0.132987	-0.0161817	0.070896	-0.00228827	-0.0271123	0.0279545	-0.0218336	-0.0661515	-0.00228827	-0.0271123	0.0987579	0.018005	0.0306867
myalgia	0.012409	0.0710798	0.0584585	0.0435747	-0.028245	0.0465253	0.0722112	-0.0171765	0.0181708	0.0321123	0.0266913	0.0595138	-0.0124149	0.029635	-0.00422224	-0.0124137	0.0860292	0.0464568	0.0221766	-0.0177481	-0.0159091	-0.00109505	0.025955	-0.00173287	-0.0189128	-0.0334863	0.00908799	1	-0.0264566	0.0314091	0.000770635	-0.000770635	-0.0189289	-0.0250898	0.0139467	0.00718575	-0.00539449	0.00593456	0.00399959	0.0150974	0.00718575	-0.00539449	-0.0164346	-0.0105106	-0.0368359
Median_Income	0.0274881	0.0439275	-0.0220774	0.071354	-0.0146695	0.0765425	-0.0564112	0.0871471	0.0423192	0.015641	0.0812088	0.0164487	-0.00372698	0.051506	0.0467339	-0.0176264	0.0583058	0.0367594	-0.0285184	0.0752805	0.0186896	0.00510043	0.0530484	0.0435866	0.0185727	0.102617	0.0424419	-0.0264566	1	0.108063	-0.0468678	0.0468678	-0.224138	0.0142824	-0.127347	-0.0356812	0.00953605	0.290009	-0.229201	0.0859565	-0.0356812	0.00953605	0.175273	-0.0403708	0.0872789
PATIENT_AGE	0.151376	0.228964	-0.0518049	0.092648	0.00917554	0.308202	0.082183	0.326823	0.058991	0.00098106	0.329217	0.17556	-0.00582234	0.206578	0.153619	-0.00795095	0.160746	0.390985	0.0926018	0.225507	0.0925161	-0.235207	-0.0223954	-0.0952409	-0.0192604	0.000944543	-0.0785504	0.0314091	0.108063	1	0.00678324	-0.00678324	-0.150393	-0.034483	-0.0849481	0.0045507	-0.055618	0.20032	-0.382913	0.634048	0.0045507	-0.055618	-0.251403	-0.170692	-0.0215148
Female	-0.000466059	-0.0185076	-0.0236357	0.0549922	-0.0467902	-0.0574573	0.0315101	0.0238109	0.129949	0.024703	0.00963098	0.0202496	0.0762063	0.184391	-0.052555	0.00472782	-0.0176227	-0.040149	-0.0128481	-0.0252398	-0.0821699	0.120713	-0.0327337	-0.0108771	0.0267969	-0.0177238	-0.0170572	0.000770635	-0.0468678	0.00678324	1	-1	0.0760779	0.00751966	-0.0430287	0.0359087	-0.0142774	-0.0296597	0.0380321	0.0245839	0.0359087	-0.0142774	-0.0496699	-0.0372367	-0.0263887
Male	0.000466059	0.0185076	0.0236357	-0.0549922	0.0467902	0.0574573	-0.0315101	-0.0238109	-0.129949	-0.024703	-0.00963098	-0.0202496	-0.0762063	-0.184391	0.052555	-0.00472782	0.0176227	0.040149	0.0128481	0.0252398	0.0821699	-0.120713	0.0327337	0.0108771	-0.0267969	0.0177238	0.0170572	-0.000770635	0.0468678	-0.00678324	-1	1	-0.0760779	-0.00751966	0.0430287	-0.0359087	0.0142774	0.0296597	-0.0380321	-0.0245839	-0.0359087	0.0142774	0.0496699	0.0372367	0.0263887
American Indian	-0.011455	-0.0334847	0.0762115	-0.0304658	-0.015292	-0.0796742	0.0242051	-0.0560888	-0.089034	-0.0378194	-0.110852	-0.046267	0.0348033	-0.0542952	-0.0709612	-0.0280681	-0.0402437	-0.0517453	-0.0273016	-0.0837723	-0.0460391	0.0290431	-0.0301241	-0.110668	-0.0673311	-0.142513	-0.132987	-0.0189289	-0.224138	-0.150393	0.0760779	-0.0760779	1	-0.0806609	-0.303458	-0.0962149	-0.0173427	-0.30083	0.194423	-0.11928	-0.0962149	-0.0173427	-0.0436009	-0.041402	-0.15622
Black or African American	0.0516564	0.0971407	0.0586905	0.0175462	-0.0163388	0.00948763	0.028532	0.00733801	-0.0156744	0.0456663	0.0110606	-0.0473446	0.0271372	0.00133425	0.0186692	-0.0123383	-0.0181788	-0.0470176	0.0281401	-0.019444	0.0400874	-0.0061632	-0.0148313	-0.0175991	0.012482	-0.0112955	-0.0161817	-0.0250898	0.0142824	-0.034483	0.00751966	-0.00751966	-0.0806609	1	-0.167971	-0.0532572	-0.00959959	-0.166517	-0.0188896	0.00622826	-0.0532572	-0.00959959	0.0131122	0.00232802	0.0196988
Hispanic	-0.0310092	-0.0779671	-0.0491225	-0.0659132	0.0973279	-0.107273	0.0631623	-0.0542641	-0.0824178	-0.0119849	-0.063387	-0.0705094	-0.0115684	-0.0513127	-0.0385743	-0.0256053	-0.0743513	-0.0375144	0.0490554	-0.0892066	-0.0525916	0.0133512	-0.0606056	0.0890026	0.00619233	0.123671	0.070896	0.0139467	-0.127347	-0.0849481	-0.0430287	0.0430287	-0.303458	-0.167971	1	-0.200361	0.0105176	-0.62646	0.118917	-0.115288	-0.200361	0.0105176	-0.0140183	0.0391343	0.0369767
Others	0.00463238	-0.028873	0.0135773	-0.0414285	-0.0213499	-0.0289385	-0.0228388	-0.0224209	-0.0272331	-0.00676592	-0.0196323	-0.0225806	0.036673	-0.0308879	-0.00576999	-0.00204595	-0.019445	-0.019866	-0.0586844	-0.0370257	-0.0278384	-0.0608588	-0.0545461	-0.0335572	-0.010538	-0.0420325	-0.00228827	0.00718575	-0.0356812	0.0045507	0.0359087	-0.0359087	-0.0962149	-0.0532572	-0.200361	1	-0.0114507	-0.198626	-0.0174661	-0.00786806	1	-0.0114507	0.0126518	0.0308505	-0.047615
Others	-0.0163632	-0.0267159	-0.011916	-0.00906494	-0.0108068	-0.0234662	-0.0237036	-0.0129532	-0.0225912	-0.0153937	-0.0405877	-0.019304	-0.00475006	-0.0202923	-0.0137518	-0.0117109	-0.00941691	-0.0170086	-0.0146094	-0.02033	-0.0126143	0.031204	-0.0187251	-0.00161536	-0.0134269	-0.0170535	-0.0271123	-0.00539449	0.00953605	-0.055618	-0.0142774	0.0142774	-0.0173427	-0.00959959	0.0105176	-0.0114507	1	0.0109236	-0.0284123	-0.0415276	-0.0114507	1	-0.022993	-0.0112392	0.00812777
White/Caucasian	0.0151712	0.0747302	-0.0340496	0.0998205	-0.0698361	0.172253	-0.0806154	0.10069	0.1634	0.0222268	0.144456	0.133066	-0.0414298	0.103129	0.0823306	0.0510242	0.119124	0.1023	-0.0135423	0.172939	0.0811419	-0.00105055	0.114134	0.0103477	0.0398851	-0.00105586	0.0279545	0.00593456	0.290009	0.20032	-0.0296597	0.0296597	-0.30083	-0.166517	-0.62646	-0.198626	0.0109236	1	-0.236031	0.198513	-0.198626	0.0109236	0.0323055	-0.0268451	0.0850322
Medicaid	-0.0599879	-0.100386	0.12068	-0.0220029	-0.0215716	-0.174145	0.00021946	-0.143559	-0.0610342	-0.000869361	-0.143751	-0.0588818	0.0342852	-0.0855513	-0.0695122	0.0141235	-0.0950508	-0.142889	-0.00852832	-0.0801649	-0.0447899	0.0746499	-0.0366897	-0.00797437	-0.0204804	-0.0326526	-0.0218336	0.00399959	-0.229201	-0.382913	0.0380321	-0.0380321	0.194423	-0.0188896	0.118917	-0.0174661	-0.0284123	-0.236031	1	-0.571659	-0.0174661	-0.0284123	-0.316517	-0.154717	-0.0300737
Medicare	0.144296	0.238668	-0.0627823	0.108629	0.025992	0.326693	0.0960643	0.260938	0.129026	0.0168736	0.313465	0.166068	-0.00559097	0.194298	0.152154	0.0509958	0.153922	0.325114	0.0998895	0.159514	0.0951742	-0.132693	0.0429483	-0.0793205	0.00756555	-0.00949794	-0.0661515	0.0150974	0.0859565	0.634048	0.0245839	-0.0245839	-0.11928	0.00622826	-0.115288	-0.00786806	-0.0415276	0.198513	-0.571659	1	-0.00786806	-0.0415276	-0.462622	-0.226134	0.0164696
Others_race	0.00463238	-0.028873	0.0135773	-0.0414285	-0.0213499	-0.0289385	-0.0228388	-0.0224209	-0.0272331	-0.00676592	-0.0196323	-0.0225806	0.036673	-0.0308879	-0.00576999	-0.00204595	-0.019445	-0.019866	-0.0586844	-0.0370257	-0.0278384	-0.0608588	-0.0545461	-0.0335572	-0.010538	-0.0420325	-0.00228827	0.00718575	-0.0356812	0.0045507	0.0359087	-0.0359087	-0.0962149	-0.0532572	-0.200361	1	-0.0114507	-0.198626	-0.0174661	-0.00786806	1	-0.0114507	0.0126518	0.0308505	-0.047615
Others_insurance	-0.0163632	-0.0267159	-0.011916	-0.00906494	-0.0108068	-0.0234662	-0.0237036	-0.0129532	-0.0225912	-0.0153937	-0.0405877	-0.019304	-0.00475006	-0.0202923	-0.0137518	-0.0117109	-0.00941691	-0.0170086	-0.0146094	-0.02033	-0.0126143	0.031204	-0.0187251	-0.00161536	-0.0134269	-0.0170535	-0.0271123	-0.00539449	0.00953605	-0.055618	-0.0142774	0.0142774	-0.0173427	-0.00959959	0.0105176	-0.0114507	1	0.0109236	-0.0284123	-0.0415276	-0.0114507	1	-0.022993	-0.0112392	0.00812777
Private	-0.0780608	-0.125048	-0.0337952	-0.0957716	0.00450172	-0.148576	-0.0799791	-0.129759	-0.0625325	-0.0159059	-0.140897	-0.0943195	-0.0158443	-0.0887705	-0.0748419	-0.0564362	-0.0534594	-0.16628	-0.0750433	-0.0859319	-0.041368	0.0749642	0.0126835	0.0948483	0.0291038	0.0522792	0.0987579	-0.0164346	0.175273	-0.251403	-0.0496699	0.0496699	-0.0436009	0.0131122	-0.0140183	0.0126518	-0.022993	0.0323055	-0.316517	-0.462622	0.0126518	-0.022993	1	-0.125206	0.00485374
Self_pay	-0.0544628	-0.0949279	-0.037885	-0.0223337	-0.0196023	-0.100697	-0.0627951	-0.0537815	-0.0454528	-0.0038844	-0.140993	-0.0744336	-0.025866	-0.0927042	-0.0589523	-0.0363557	-0.0512789	-0.128257	-0.0643958	-0.0336862	-0.0429841	0.0038685	-0.0392702	0.0212079	-0.0243548	-0.00377984	0.018005	-0.0105106	-0.0403708	-0.170692	-0.0372367	0.0372367	-0.041402	0.00232802	0.0391343	0.0308505	-0.0112392	-0.0268451	-0.154717	-0.226134	0.0308505	-0.0112392	-0.125206	1	0.0128442
Admitted through ED	0.0562327	0.0178109	-0.0106295	0.0634347	-0.0875626	0.0321093	-0.0432207	0.0629115	0.0167965	0.00210217	0.0419089	0.05131	0.0136474	-0.0282611	0.0484936	-0.0166448	0.0107616	-0.0601489	0.0718899	-0.00973913	-0.00511597	-0.0522001	-0.000501553	-0.00370531	-0.004864	0.126754	0.0306867	-0.0368359	0.0872789	-0.0215148	-0.0263887	0.0263887	-0.15622	0.0196988	0.0369767	-0.047615	0.00812777	0.0850322	-0.0300737	0.0164696	-0.047615	0.00812777	0.00485374	0.0128442	1

## Sheet: S6 VIF_ICU
	variables	VIF
34	Others_insurance	1.01197
12	Hyperthyroidism	1.03921
27	myalgia	1.05185
24	abd	1.12493
33	Others_race	1.1292
2	ChronicLiver	1.12962
30	Black or African American	1.13239
15	Insomnia	1.13387
4	ChronicLung	1.13645
20	VentricularFibrillation	1.18204
36	Self_pay	1.20198
9	Dyslipidemia	1.20224
16	Defibrillator	1.20794
7	Dementia	1.24707
18	AcuteMyocardialInfarction	1.26063
0	Stroke	1.26392
14	IschemicHeart	1.2735
13	Hypothyroidism	1.34966
19	AtrialFibrillation	1.39409
11	Hypertension	1.40909
8	Depression	1.40943
29	American Indian	1.41677
22	SleepApnea	1.43332
37	Admitted thorugh ED	1.74098
1	ChronicKidney	1.75529
26	fever	1.79159
23	cough	1.87095
5	CoronaryHeart	1.94081
21	MorbidObesity	2.04872
31	Hispanic	2.08647
25	dyspnea	2.11158
17	NotResuscitate	2.18505
32	Medicaid	2.19653
28	Male	2.2975
6	DiabetesMellitus	2.39952
3	Hypoxemia	2.45996
10	Hyperlipidemia	2.5971
35	Medicare	3.41085

## Sheet: S7 Native&Age_ventilation
	comb	chi2	p	dof	corrected_p
0	('Am18', 'Am40')	9.81995	0.00172629	1	0.0063076
1	('Am18', 'Am60')	25.5214	4.375e-07	1	3.325e-06
2	('Am18', 'Am>=')	2.68733	0.101149	1	0.190281
3	('Am18', 'Bl18')	3.12134	0.0772733	1	0.15136
4	('Am18', 'Bl40')	1.64813	0.199214	1	0.344097
5	('Am18', 'Bl60')	0.356194	0.550628	1	0.697462
6	('Am18', 'Bl>=')	0.0423216	0.837008	1	0.935479
7	('Am18', 'Hi18')	8.7596	0.00307977	1	0.00991791
8	('Am18', 'Hi40')	0.00725441	0.932124	1	0.969117
9	('Am18', 'Hi60')	4.33851	0.0372595	1	0.0852929
10	('Am18', 'Hi>=')	0.0163413	0.898281	1	0.958839
11	('Am18', 'Ot18')	0.59064	0.442172	1	0.613231
12	('Am18', 'Ot40')	0.0524953	0.818777	1	0.927963
13	('Am18', 'Ot60')	4.69595	0.0302337	1	0.072714
14	('Am18', 'Ot>=')	0.15076	0.69781	1	0.833861
15	('Am18', 'Wh18')	4.37048	0.0365666	1	0.0847275
16	('Am18', 'Wh40')	0.577009	0.447487	1	0.616106
17	('Am18', 'Wh60')	0.462761	0.496336	1	0.656212
18	('Am18', 'Wh>=')	9.69665	0.00184604	1	0.00661788
19	('Am40', 'Am60')	5.12422	0.0235942	1	0.0582195
20	('Am40', 'Am>=')	0.0190765	0.890147	1	0.955525
21	('Am40', 'Bl18')	18.7344	1.50249e-05	1	9.51575e-05
22	('Am40', 'Bl40')	20.0402	7.58308e-06	1	4.96823e-05
23	('Am40', 'Bl60')	15.6972	7.43356e-05	1	0.000381723
24	('Am40', 'Bl>=')	2.07411	0.149818	1	0.268358
25	('Am40', 'Hi18')	69.6888	6.94394e-17	1	1.88478e-15
26	('Am40', 'Hi40')	23.1546	1.49484e-06	1	1.01436e-05
27	('Am40', 'Hi60')	4.15797	0.0414391	1	0.0926286
28	('Am40', 'Hi>=')	15.1519	9.91984e-05	1	0.000495992
29	('Am40', 'Ot18')	6.82196	0.00900439	1	0.0259217
30	('Am40', 'Ot40')	5.30686	0.0212416	1	0.053812
31	('Am40', 'Ot60')	0.425709	0.514102	1	0.664486
32	('Am40', 'Ot>=')	1.42136	0.233179	1	0.381932
33	('Am40', 'Wh18')	42.6075	6.6902e-11	1	9.77799e-10
34	('Am40', 'Wh40')	34.8739	3.51761e-09	1	3.51761e-08
35	('Am40', 'Wh60')	16.4343	5.03646e-05	1	0.000289978
36	('Am40', 'Wh>=')	76.7476	1.94265e-18	1	7.38207e-17
37	('Am60', 'Am>=')	0.735627	0.391065	1	0.558665
38	('Am60', 'Bl18')	34.0984	5.23937e-09	1	4.74038e-08
39	('Am60', 'Bl40')	39.25	3.72863e-10	1	4.72293e-09
40	('Am60', 'Bl60')	34.3405	4.62665e-09	1	4.39532e-08
41	('Am60', 'Bl>=')	6.54619	0.0105109	1	0.0293687
42	('Am60', 'Hi18')	119.023	1.03529e-27	1	9.83522e-26
43	('Am60', 'Hi40')	58.4869	2.04645e-14	1	4.32029e-13
44	('Am60', 'Hi60')	24.0422	9.42448e-07	1	6.63204e-06
45	('Am60', 'Hi>=')	36.1231	1.85239e-09	1	2.07031e-08
46	('Am60', 'Ot18')	14.33	0.000153402	1	0.000728661
47	('Am60', 'Ot40')	16.3394	5.29513e-05	1	0.000295904
48	('Am60', 'Ot60')	7.40893	0.00649011	1	0.0195733
49	('Am60', 'Ot>=')	6.13217	0.0132744	1	0.0360304
50	('Am60', 'Wh18')	77.0294	1.68434e-18	1	7.38207e-17
51	('Am60', 'Wh40')	73.3681	1.0759e-17	1	3.40701e-16
52	('Am60', 'Wh60')	48.0076	4.2458e-12	1	8.06702e-11
53	('Am60', 'Wh>=')	130.149	3.8006e-30	1	7.22114e-28
54	('Am>=', 'Bl18')	8.80447	0.00300494	1	0.00984378
55	('Am>=', 'Bl40')	6.92339	0.00850757	1	0.0248683
56	('Am>=', 'Bl60')	4.62966	0.0314239	1	0.0746317
57	('Am>=', 'Bl>=')	1.0802	0.298654	1	0.461335
58	('Am>=', 'Hi18')	15.0275	0.000105953	1	0.000516182
59	('Am>=', 'Hi40')	3.09175	0.0786902	1	0.152563
60	('Am>=', 'Hi60')	0.460609	0.497339	1	0.656212
61	('Am>=', 'Hi>=')	3.57661	0.0585985	1	0.119717
62	('Am>=', 'Ot18')	3.84	0.0500435	1	0.108049
63	('Am>=', 'Ot40')	1.63394	0.201159	1	0.344325
64	('Am>=', 'Ot60')	0.0611718	0.804653	1	0.927963
65	('Am>=', 'Ot>=')	0.603557	0.437224	1	0.610828
66	('Am>=', 'Wh18')	10.6622	0.00109349	1	0.0044205
67	('Am>=', 'Wh40')	5.65785	0.0173774	1	0.0452288
68	('Am>=', 'Wh60')	2.06083	0.151128	1	0.268358
69	('Am>=', 'Wh>=')	15.815	6.9846e-05	1	0.000368631
70	('Bl18', 'Bl40')	0.274515	0.600319	1	0.740653
71	('Bl18', 'Bl60')	1.37191	0.241485	1	0.388831
72	('Bl18', 'Bl>=')	1.25456	0.262683	1	0.413187
73	('Bl18', 'Hi18')	0.00977027	0.921262	1	0.969117
74	('Bl18', 'Hi40')	4.87305	0.0272792	1	0.0664493
75	('Bl18', 'Hi60')	12.6479	0.000375982	1	0.00166132
76	('Bl18', 'Hi>=')	2.77297	0.0958682	1	0.183989
77	('Bl18', 'Ot18')	0.0112087	0.915685	1	0.969117
78	('Bl18', 'Ot40')	3.91889	0.0477464	1	0.104274
79	('Bl18', 'Ot60')	12.8602	0.00033564	1	0.00151837
80	('Bl18', 'Ot>=')	3.39711	0.0653107	1	0.129261
81	('Bl18', 'Wh18')	0.0977944	0.754493	1	0.880623
82	('Bl18', 'Wh40')	2.08968	0.148297	1	0.268358
83	('Bl18', 'Wh60')	6.78627	0.00918614	1	0.0260503
84	('Bl18', 'Wh>=')	0.0236659	0.877738	1	0.947558
85	('Bl40', 'Bl60')	0.314172	0.575131	1	0.723675
86	('Bl40', 'Bl>=')	0.442682	0.505831	1	0.662813
87	('Bl40', 'Hi18')	0.70293	0.401801	1	0.565498
88	('Bl40', 'Hi40')	3.46291	0.0627598	1	0.12552
89	('Bl40', 'Hi60')	13.1313	0.000290406	1	0.00134579
90	('Bl40', 'Hi>=')	1.32615	0.249492	1	0.398349
91	('Bl40', 'Ot18')	0.0321941	0.857602	1	0.941875
92	('Bl40', 'Ot40')	2.38215	0.122728	1	0.228612
93	('Bl40', 'Ot60')	12.3165	0.000448966	1	0.00193872
94	('Bl40', 'Ot>=')	1.98553	0.158809	1	0.279386
95	('Bl40', 'Wh18')	0.057	0.811302	1	0.927963
96	('Bl40', 'Wh40')	0.721907	0.395519	1	0.560811
97	('Bl40', 'Wh60')	5.7046	0.0169205	1	0.0446513
98	('Bl40', 'Wh>=')	0.86419	0.352569	1	0.515293
99	('Bl60', 'Bl>=')	0.0514758	0.820515	1	0.927963
100	('Bl60', 'Hi18')	3.7534	0.0527002	1	0.111256
101	('Bl60', 'Hi40')	1.14866	0.283829	1	0.442029
102	('Bl60', 'Hi60')	9.15086	0.00248601	1	0.00843469
103	('Bl60', 'Hi>=')	0.164806	0.684769	1	0.823457
104	('Bl60', 'Ot18')	0.0969822	0.755482	1	0.880623
105	('Bl60', 'Ot40')	0.839946	0.359412	1	0.521285
106	('Bl60', 'Ot60')	8.65099	0.00326883	1	0.0102249
107	('Bl60', 'Ot>=')	0.821494	0.364744	1	0.52501
108	('Bl60', 'Wh18')	1.4049	0.235905	1	0.383094
109	('Bl60', 'Wh40')	0.00116356	0.972789	1	0.977936
110	('Bl60', 'Wh60')	2.74577	0.0975118	1	0.185272
111	('Bl60', 'Wh>=')	4.25575	0.0391177	1	0.0884804
112	('Bl>=', 'Hi18')	1.90467	0.167557	1	0.292072
113	('Bl>=', 'Hi40')	0.0473125	0.827807	1	0.930671
114	('Bl>=', 'Hi60')	0.56688	0.451501	1	0.61716
115	('Bl>=', 'Hi>=')	0.00266436	0.958834	1	0.977936
116	('Bl>=', 'Ot18')	0.24664	0.619451	1	0.754459
117	('Bl>=', 'Ot40')	0.00698101	0.933412	1	0.969117
118	('Bl>=', 'Ot60')	1.00393	0.316362	1	0.476632
119	('Bl>=', 'Ot>=')	0.00791285	0.929118	1	0.969117
120	('Bl>=', 'Wh18')	0.994722	0.318591	1	0.476632
121	('Bl>=', 'Wh40')	0.0565442	0.812044	1	0.927963
122	('Bl>=', 'Wh60')	0.00504855	0.943355	1	0.970351
123	('Bl>=', 'Wh>=')	2.06306	0.150907	1	0.268358
124	('Hi18', 'Hi40')	26.3057	2.91426e-07	1	2.30712e-06
125	('Hi18', 'Hi60')	67.7694	1.8378e-16	1	4.36478e-15
126	('Hi18', 'Hi>=')	9.08549	0.00257646	1	0.0085882
127	('Hi18', 'Ot18')	0.0237178	0.877605	1	0.947558
128	('Hi18', 'Ot40')	9.59601	0.00195	1	0.00686113
129	('Hi18', 'Ot60')	40.3974	2.07219e-10	1	2.81225e-09
130	('Hi18', 'Ot>=')	5.93765	0.0148208	1	0.0396613
131	('Hi18', 'Wh18')	0.390765	0.531897	1	0.682841
132	('Hi18', 'Wh40')	9.99842	0.00156675	1	0.00590695
133	('Hi18', 'Wh60')	37.5692	8.82268e-10	1	1.04769e-08
134	('Hi18', 'Wh>=')	6.53931e-05	0.993548	1	0.993548
135	('Hi40', 'Hi60')	18.3225	1.86488e-05	1	0.000114299
136	('Hi40', 'Hi>=')	0.280845	0.596148	1	0.740314
137	('Hi40', 'Ot18')	0.94695	0.330497	1	0.486778
138	('Hi40', 'Ot40')	0.0368269	0.847818	1	0.936543
139	('Hi40', 'Ot60')	8.64326	0.00328273	1	0.0102249
140	('Hi40', 'Ot>=')	0.137693	0.710585	1	0.838579
141	('Hi40', 'Wh18')	11.5133	0.000690989	1	0.00285409
142	('Hi40', 'Wh40')	3.73088	0.0534151	1	0.111526
143	('Hi40', 'Wh60')	1.56773	0.210536	1	0.350894
144	('Hi40', 'Wh>=')	30.6592	3.07565e-08	1	2.54076e-07
145	('Hi60', 'Hi>=')	8.30708	0.00394909	1	0.0121021
146	('Hi60', 'Ot18')	3.77446	0.0520406	1	0.111098
147	('Hi60', 'Ot40')	1.58255	0.208393	1	0.350602
148	('Hi60', 'Ot60')	0.488278	0.484697	1	0.653137
149	('Hi60', 'Ot>=')	0.139738	0.708542	1	0.838579
150	('Hi60', 'Wh18')	35.1903	2.99013e-09	1	3.15625e-08
151	('Hi60', 'Wh40')	30.9713	2.6187e-08	1	2.2616e-07
152	('Hi60', 'Wh60')	9.97645	0.00158555	1	0.00590695
153	('Hi60', 'Wh>=')	77.6628	1.22224e-18	1	7.38207e-17
154	('Hi>=', 'Ot18')	0.426822	0.513553	1	0.664486
155	('Hi>=', 'Ot40')	0.264194	0.607254	1	0.744375
156	('Hi>=', 'Ot60')	7.36029	0.00666801	1	0.0197956
157	('Hi>=', 'Ot>=')	0.356931	0.550216	1	0.697462
158	('Hi>=', 'Wh18')	4.12712	0.0422011	1	0.0932351
159	('Hi>=', 'Wh40')	0.296364	0.586171	1	0.732714
160	('Hi>=', 'Wh60')	1.52657	0.216628	1	0.357907
161	('Hi>=', 'Wh>=')	10.2135	0.00139414	1	0.00540585
162	('Ot18', 'Ot40')	0.95367	0.328787	1	0.486778
163	('Ot18', 'Ot60')	4.51179	0.0336621	1	0.0789604
164	('Ot18', 'Ot>=')	1.03403	0.309215	1	0.473797
165	('Ot18', 'Wh18')	0.0261917	0.871433	1	0.947558
166	('Ot18', 'Wh40')	0.181684	0.66993	1	0.810744
167	('Ot18', 'Wh60')	1.5817	0.208516	1	0.350602
168	('Ot18', 'Wh>=')	0.0389892	0.84347	1	0.936543
169	('Ot40', 'Ot60')	2.29081	0.130142	1	0.240068
170	('Ot40', 'Ot>=')	0.00479126	0.944815	1	0.970351
171	('Ot40', 'Wh18')	5.32503	0.0210213	1	0.053812
172	('Ot40', 'Wh40')	1.25219	0.263135	1	0.413187
173	('Ot40', 'Wh60')	0.00195534	0.96473	1	0.977936
174	('Ot40', 'Wh>=')	10.4624	0.00121829	1	0.00482238
175	('Ot60', 'Ot>=')	0.471723	0.492195	1	0.656212
176	('Ot60', 'Wh18')	25.0596	5.55852e-07	1	4.062e-06
177	('Ot60', 'Wh40')	16.1114	5.97248e-05	1	0.00032422
178	('Ot60', 'Wh60')	5.27567	0.0216255	1	0.0540637
179	('Ot60', 'Wh>=')	44.0063	3.27314e-11	1	5.65361e-10
180	('Ot>=', 'Wh18')	3.64485	0.056243	1	0.116154
181	('Ot>=', 'Wh40')	1.00488	0.316133	1	0.476632
182	('Ot>=', 'Wh60')	0.00161788	0.967915	1	0.977936
183	('Ot>=', 'Wh>=')	6.34899	0.0117448	1	0.0323408
184	('Wh18', 'Wh40')	3.51113	0.0609579	1	0.123213
185	('Wh18', 'Wh60')	17.474	2.91257e-05	1	0.000172934
186	('Wh18', 'Wh>=')	0.555139	0.456226	1	0.619163
187	('Wh40', 'Wh60')	9.42615	0.00213913	1	0.00738971
188	('Wh40', 'Wh>=')	11.761	0.00060484	1	0.00255377
189	('Wh60', 'Wh>=')	43.6333	3.96033e-11	1	6.27053e-10
